# Supplementary material for: Construction of heterostructured TiO2/InVO4/RGO microspheres with dual-channels for photo-generated charge separation
Source: Royal Society of Chemistry journal article supplement (doi:10.1039/c5ra17676j), 2015-01-01
Supplement: c5ra17676j1.pdf [file c5ra17676j1.pdf]

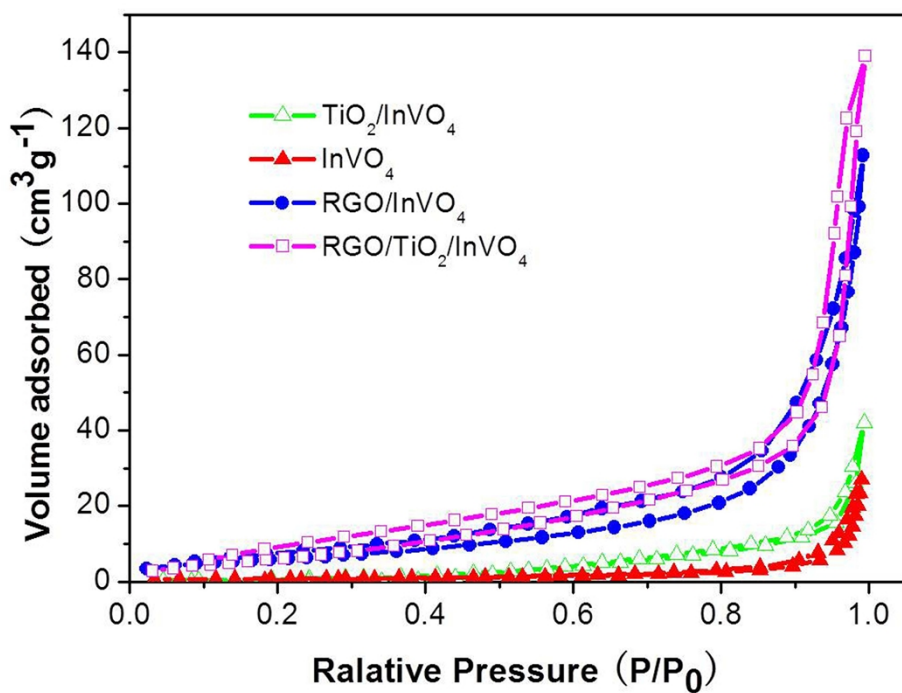

Fig. S1 N<sub>2</sub> adsorption-desorption isotherm curves of the as-prepared samples.

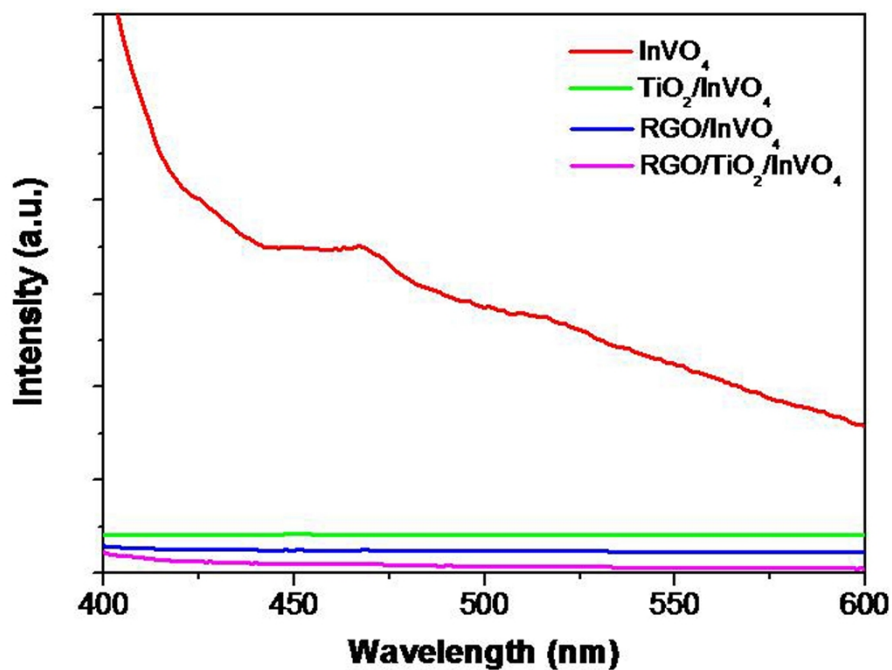

Fig. S2 Room temperature PL spectra of as-synthesized samples under the excitation wavelength of 325 nm.
